October 2012

# PSYCHIATRIC SERVICES

A Journal of the American Psychiatric Association

October 2012

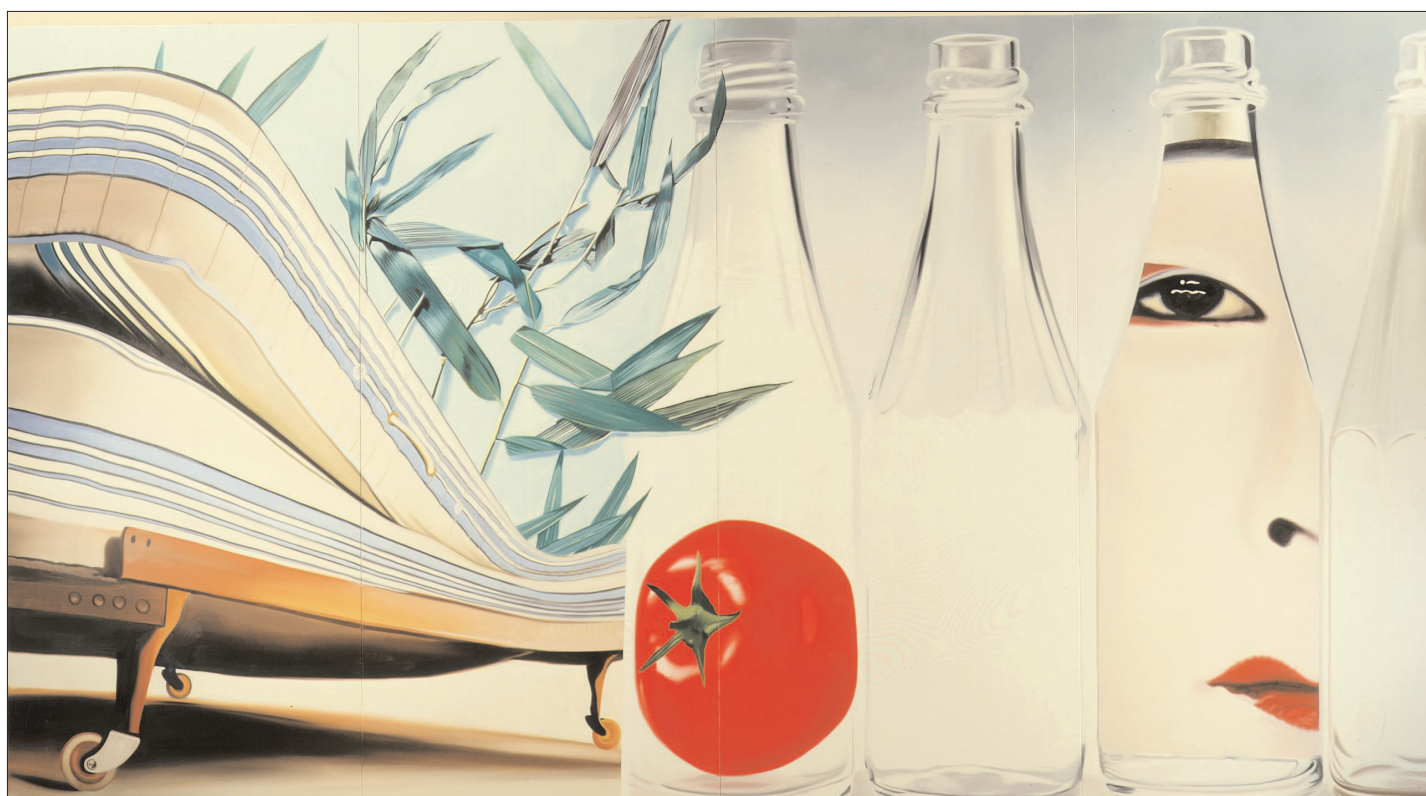

Psychiatric Services

Vol. 63 No. 10 pp. 953-1058

- ◆ Strategies to Eliminate Public and Self-Stigma: Two Literature Reviews
- ◆ Focus on Service Use by Children and Adolescents: Six New Research Studies
- ◆ Is Antipsychiatry Dead or Resurfacing? New Forms in a New Century
